# Supplementary material
Source: HighWire-hosted journal article supplement (https://bmjopenrespres.bmj.com/content/11/1/e002163)
Supplement: inline-supplementary-material-1 [file inline-supplementary-material-1.pdf]

**SUPPLEMENT ANNEX TO:****Mycophenolate and Azathioprine for interstitial lung disease: a systematic review and meta-analysis**

Francesco Lombardi<sup>1</sup>, Iain Stewart<sup>2</sup>, Laura Fabbri<sup>2</sup>, Wendy Adams<sup>3</sup>, Leticia Kawano Dourado<sup>4, 5</sup>, Chris Ryerson<sup>6</sup>, Gisli Jenkins<sup>2</sup> on behalf of the REMAP-ILD consortium

<sup>1</sup> Division of Pulmonary Medicine, Fondazione Policlinico Universitario Agostino Gemelli IRCCS, Italy

<sup>2</sup> National Heart and Lung Institute, Imperial College London, United Kingdom

<sup>3</sup> Action for Pulmonary Fibrosis, United Kingdom

<sup>4</sup> HCOR Research Institute, Hospital do Coracao, Sao Paulo, Brazil

<sup>5</sup> Pulmonary Division, Heart Institute (InCor), University of Sao Paulo, Brazil

<sup>6</sup> University of British Columbia, Canada

Contact address: Division of Pulmonary Medicine, Fondazione Policlinico Universitario Agostino Gemelli IRCCS, Largo Agostino Gemelli 8, 00168 Rome, Italy

Corresponding author: Francesco Lombardi, [francesco.lombardi@policlinicogemelli.it](mailto:francesco.lombardi@policlinicogemelli.it)

**Index**

|                                                                                                                                                                                      |    |
|--------------------------------------------------------------------------------------------------------------------------------------------------------------------------------------|----|
| Supplemental Document 1 – PICO question .....                                                                                                                                        | 3  |
| Supplemental Document 2 – Search Strategy.....                                                                                                                                       | 4  |
| Medline.....                                                                                                                                                                         | 4  |
| Embase .....                                                                                                                                                                         | 5  |
| Supplemental Document 3 – Ongoing trials.....                                                                                                                                        | 6  |
| Supplemental Table 1 – Characteristics of excluded full texts.....                                                                                                                   | 7  |
| Supplemental Table 2 - Newcastle – Ottawa Quality assessment scale for cohort studies.....                                                                                           | 10 |
| Supplemental Figure 1 - Funnel plot for publication bias inclusive of all MMF and AZA studies .....                                                                                  | 11 |
| Supplemental Figure 2 - Secondary endpoint analysis of efficacy on pulmonary function compared to baseline with summary estimate by drug subgroup .....                              | 12 |
| Supplemental Figure 3 - Secondary endpoint analysis of efficacy on pulmonary function compared to baseline with summary estimate by follow-up time in MMF treated participants ..... | 13 |
| Supplemental Table 3 – Table of adverse events.....                                                                                                                                  | 14 |
| REMAP-ILD Consortium list: .....                                                                                                                                                     | 15 |

**Supplemental Document 1 – PICO question**

Our PICO question is: “Does Mycophenolate or Azathioprine improve lung function in patients with interstitial lung disease?”

Population:

Patients with:

- Interstitial lung disease (ILD)
- Idiopathic Pulmonary Fibrosis (IPF)
- Connective tissue disease with ILD (CTD-ILD)

Intervents:

- Mycophenolate mofetil (MMF)
- Mycophenolic acid
- Enteric-coated mycophenolate sodium
- Azathioprine (AZA)

Comparators:

- Placebo, standard of care or other interventional drugs
- Change from baseline (FVC, DLco)

Outcome:

- Lung function
- Pulmonary function test (PFT)
- Forced vital capacity (FVC)
- Diffusion Lung capacity for carbon monoxide (DLco)

**Supplemental Document 2 – Search Strategy**

## Medline

1. exp Lung Diseases, Interstitial/
2. sarcoidosis/ or sarcoidosis, pulmonary/
3. (pulmonar\* adj (fibros\* or fibrot\*)).tw
4. (lung\* adj (fibros\* or fibrot\*)).tw.
5. (Interstitial Lung Disease\* or Pulmonary Fibrosis or Diffuse Lung Parenchymal Disease\* or Sarcoidosis or Sarcoid or ILD or fILD or IPF or PFILD or PPF or DLPD or DLPDs).tw.
6. 1 or 2 or 3 or 4 or 5
7. exp Connective Tissue Diseases/
8. scleroderm\*.tw.
9. systemic sclerosi\*.tw.
10. (CTD or LES or RA or SS or SSc).tw.
11. 7 or 8 or 9 or 10
- 12. 6 or 11**
13. Mycophenolic Acid/
14. (Mycophenolate Mofetil or Mycophenolic Acid or Morpholinoethyl Ester or Cellcept or Mycophenolate Sodium or Sodium Mycophenolate or Myfortic or Mycophenolate Mofetil Hydrochloride or MMF).tw
15. 13 or 14
16. Azathioprine/
17. (Imurel or Imuran or Immuran or Azathioprine Sodium or Sodium, Azathioprine or Azathioprine Sodium Salt or Azathioprine Sulfate or AZA).tw
18. 16 or 17
- 19. 15 or 18**
20. exp Respiratory Function Tests
21. (Vital Capacit\* or Lung capacit\* or Diffusing capacit\*).tw.
22. (Lung function or Pulmonary function or Respiratory function).tw.
23. (FVC or DLco or TLco or Kco).mp.
- 24. 20 or 21 or 22 or 23**
- 25. 12 and 19 and 24**

## Embase

1. exp interstitial lung disease/
2. exp lung sarcoidosis/
3. (pulmonar\* adj (fibros\* or fibrot\*)).tw.
4. (lung\* adj (fibros\* or fibrot\*)).tw.
5. (Interstitial Lung Disease\* or Pulmonary Fibrosis or Diffuse Lung Parenchymal Disease\* or Sarcoidosis or Sarcoid or ILD or fILD or IPF or PFILD or PPF or DLPD or DLPDs).tw.
6. 1 or 2 or 3 or 4 or 5
7. exp connective tissue diseases/
8. scleroderm\*.tw.
9. systemic sclerosi\*.tw.
10. (connective tissue disease\* or CTD or systemic lupus erythematosus or LES or rheumatoid arthritis or RA or myositis or Sjogren's syndrome or SS).tw.
11. 7 or 8 or 9 or 10
12. **6 or 11**
13. exp mycophenolic acid/
14. (Mycophenolate Mofetil or Mycophenolic Acid or Morpholinoethyl Ester or Cellcept or Mycophenolate Sodium or Sodium Mycophenolate or Myfortic or Mycophenolate Mofetil Hydrochloride or MMF).tw
15. 13 or 14
16. exp azathioprine/
17. (Imurel or Imuran or Immuran or Azathioprine Sodium or Sodium, Azathioprine or Azathioprine Sodium Salt or Azathioprine Sulfate or AZA).tw
18. 16 or 17
19. **15 or 18**
20. exp lung function test/
21. (Vital Capacit\* or Lung capacit\* or Diffusing capacit\*).tw.
22. (Lung function or Pulmonary function or Respiratory function).tw.
23. (FVC or DLco or TLco or Kco).mp.
24. **20 or 21 or 22 or 23**
25. 12 and 19 and 24

### Supplemental Document 3 – Ongoing trials

#### **Mycophenolate Mofetil in Systemic Sclerosis With Subclinical Interstitial Lung Disease (SSc-mILD)**

**[NCT05785065]**: phase II pilot RCT to evaluate the feasibility of a phase III trial to assess the effectiveness of MMF in subclinical SSc-ILD. It is not recruiting yet. They calculated a sample size of 35 patients, randomized 1:1 to MMF or placebo. The rate of FVC% decline is a secondary outcome.

#### **Clinical Study of MMF in Treatment of IIM-ILD and Its Effect on Peripheral Blood Treg Cells**

**[NCT05129410]**: pilot phase IV interventional open-label study to assess the effect of MMF on IIM-ILD and Treg cells. FVC% change will be evaluated as primary outcome at 12 months follow up.

#### **An RCT of Mycophenolate Mofetil (MMF) in Fibrotic Hypersensitivity Pneumonitis (MYCOHYPE)**

**[NCT05626387]**: a randomized open label phase IV trial to assess the safety and the efficacy of MMF and prednisolone in fibrotic HP. 144 patients will be randomized 1:1 to intervention vs prednisolone alone. The primary outcome is the annual rate of FVC decline.

#### **MPA AUC Monitoring in Patients Receiving MMF for Diffuse Cutaneous or Pulmonary Involvement in Systemic Sclerosis (SCLERAMAC) [NCT04244916]**

**[NCT04244916]**: cohort study that is recruiting 50 patients to define the value AUC MPA to improve the skin disease and the lung function in SS. Change in FVC after 1 year of treatment is a secondary outcome.

Supplemental Table 1 – Characteristics of excluded full texts

| Author                  | Title                                                                                                                                                                                                                                                                  | Year | Type of study         | Treatment                                                      | Overall population | # record | Reason of exclusion                                                                                                                                                                                                                                                    |
|-------------------------|------------------------------------------------------------------------------------------------------------------------------------------------------------------------------------------------------------------------------------------------------------------------|------|-----------------------|----------------------------------------------------------------|--------------------|----------|------------------------------------------------------------------------------------------------------------------------------------------------------------------------------------------------------------------------------------------------------------------------|
| <b>Bejan-Angoulvant</b> | Evaluation of efficacy and safety of rituximab in combination with mycophenolate mofetil in patients with nonspecific interstitial pneumonia non-responding to a first-line immunosuppressive treatment (EVER-ILD): A double-blind placebo-controlled randomized trial | 2020 | Protocol registration | MMF + (rituximab or placebo)                                   | 122                | 54       | It was incomplete because it is a protocol registration. The complete study, by Mankikian and al., has been published after our last search. It was included after checking new relevant papers (see PRISMA flowchart) and is cited as reference 12 in our manuscript. |
| <b>Cegla</b>            | Therapy of the idiopathic fibrosis of the lung. Experiences with three therapeutic principles: corticosteroids in combination with azathioprine, D penicillamine and K paraaminobenz oate                                                                              | 1975 | Pilot study           | Corticosteroids + (AZA or penicillamine or paraaminebenz oate) | 27                 | 272<br>1 | High doses of steroid were administered.                                                                                                                                                                                                                               |
| <b>Fischer</b>          | Mycophenolate mofetil improves lung function in connective tissue disease-associated interstitial lung disease                                                                                                                                                         | 2013 | Retrospective study   | MMF                                                            | 125                | 144      | Retrospective selection of patients already treated (median duration of treatment: 897 days).                                                                                                                                                                          |

|                           |                                                                                                                                                                                                                         |      |                                          |                                                                                           |    |            |                                                                                                                                    |
|---------------------------|-------------------------------------------------------------------------------------------------------------------------------------------------------------------------------------------------------------------------|------|------------------------------------------|-------------------------------------------------------------------------------------------|----|------------|------------------------------------------------------------------------------------------------------------------------------------|
| <b>Hoyles</b>             | A multicenter, prospective, randomized, double-blind, placebo-controlled trial of corticosteroids and intravenous cyclophosphamide followed by oral azathioprine for the treatment of pulmonary fibrosis in scleroderma | 2006 | Randomized double-blind trial            | Prednisolone + cyclophosphamide + AZA                                                     | 45 | 186        | High doses of steroids and cyclophosphamide were administered                                                                      |
| <b>Karampitsakos</b>      | Safety and Effectiveness of Mycophenolate Mofetil in Interstitial Lung Diseases: Insights from a Machine Learning Radiographic Model                                                                                    | 2022 | Observational study                      | MMF                                                                                       | 55 | 34 and 714 | Retrospective selection of patients treated at least for 1 year.                                                                   |
| <b>Pavlov-Dolijanovic</b> | Long-term effects of immunosuppressive therapy on lung function in scleroderma patients                                                                                                                                 | 2018 | Open label trial                         | Prednisolone + cyclophosphamide.<br><br>AZA or MMF or methotrexate as maintenance therapy | 30 | 87         | High doses of steroids were administered. MMF or AZA are administered as maintenance therapy and there is not a comparative group. |
| <b>Raghu</b>              | Azathioprine combined with prednisone in the treatment of idiopathic pulmonary fibrosis: a prospective double-blind, randomized, placebo-controlled clinical trial                                                      | 1991 | Randomized double-blind controlled trial | Prednisone + (AZA or placebo)                                                             | 27 | 216        | High doses of steroids were administered.                                                                                          |



|                  |                                                                                                                                                                                              |      |                                          |                                                        |     |      |                                                                                                                                                                                                                                                                                                                  |
|------------------|----------------------------------------------------------------------------------------------------------------------------------------------------------------------------------------------|------|------------------------------------------|--------------------------------------------------------|-----|------|------------------------------------------------------------------------------------------------------------------------------------------------------------------------------------------------------------------------------------------------------------------------------------------------------------------|
| <b>Stratton</b>  | Pilot study of anti-thymocyte globulin plus mycophenolate mofetil in recent-onset diffuse scleroderma                                                                                        | 2001 | Pilot study                              | Anti-thymocyte globulin + MMF                          | 13  | 203  | The clear effect of MMF alone is not available or evaluable.                                                                                                                                                                                                                                                     |
| <b>Tashkin</b>   | Mycophenolate mofetil versus oral cyclophosphamide in scleroderma-related interstitial lung disease (SLS II): a randomised controlled, double-blind, parallel group trial                    | 2016 | Randomized double-blind controlled trial | MMF versus CYC                                         | 142 | 113  | We included the post-hoc analysis of Volkmann (reference #19) which compares MMF arm (SLS II) and placebo arm (SLS I). Tashkin study was excluded to avoid issues in independence of observations.<br><br>This study has been noted as "incomplete" in PRISMA flowchart as a more updated dataset was available. |
| <b>Vanthuyne</b> | A pilot study of mycophenolate mofetil combined to intravenous methylprednisolone pulses and oral low-dose glucocorticoids in severe early systemic sclerosis                                | 2007 | Pilot study                              | MMF + intravenous methylprednisolone + glucocorticoids | 16  | 2416 | High dose of steroids were administered.                                                                                                                                                                                                                                                                         |
| <b>Volkmann</b>  | Treatment With Mycophenolate and Cyclophosphamide Leads to Clinically Meaningful Improvements in Patient-Reported Outcomes in Scleroderma Lung Disease: Results of Scleroderma Lung Study II | 2020 | Post hoc analysis                        | Cyclophosphamide + MMF                                 | 142 | 21   | Evaluated patient reported outcomes in combination therapy, excluded due lack of measurement of interest                                                                                                                                                                                                         |

**Supplemental Table 2 - Newcastle – Ottawa Quality assessment scale for cohort studies**

|                     | Selection Bias               |                              |                           |                                  | Comparability |                    | Outcome    |                  | TOT |                       |
|---------------------|------------------------------|------------------------------|---------------------------|----------------------------------|---------------|--------------------|------------|------------------|-----|-----------------------|
|                     | Representativeness of cohort | Selection of the non exposed | Ascertainment of exposure | Outcome not present at the start | Main factors  | Additional factors | Assessment | Follow-up length |     | Adequacy of FU cohort |
| Derk (2009)         | *                            | *                            | *                         | *                                | *             | *                  | *          | *                | -   | 8                     |
| Henes (2012)        | *                            | *                            | -                         | *                                | *             | *                  | *          | *                | -   | 7                     |
| Liossis (2006)      | *                            | -                            | -                         | *                                | *             | *                  | *          | -                | *   | 6                     |
| Mendoza (2012)      | -                            | *                            | -                         | *                                | *             | *                  | *          | *                | -   | 6                     |
| Paone (2007)        | *                            | *                            | -                         | *                                | *             | *                  | *          | *                | *   | 8                     |
| Simeon-Aznar (2011) | *                            | *                            | -                         | *                                | *             | *                  | *          | *                | *   | 8                     |
| Vaiarello (2020)    | *                            | *                            | -                         | *                                | *             | *                  | *          | *                | *   | 8                     |

**Supplemental Figure 1 - Funnel plot for publication bias inclusive of all MMF and AZA studies**

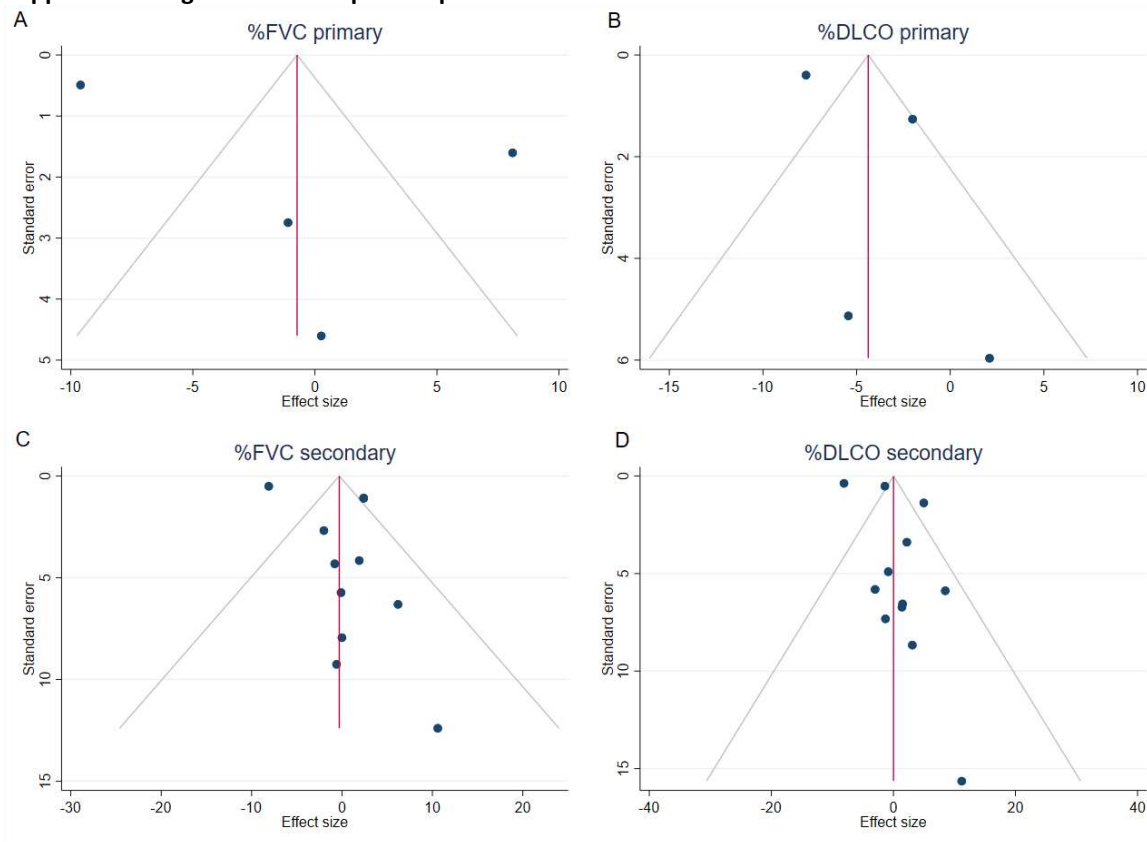

**Supplemental Figure 2 - Secondary endpoint analysis of efficacy on pulmonary function compared to baseline with summary estimate by drug subgroup**

**A**

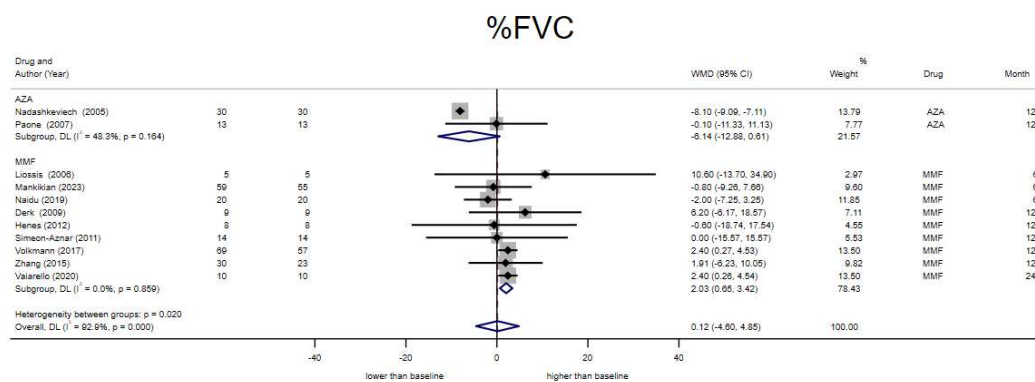

**B**

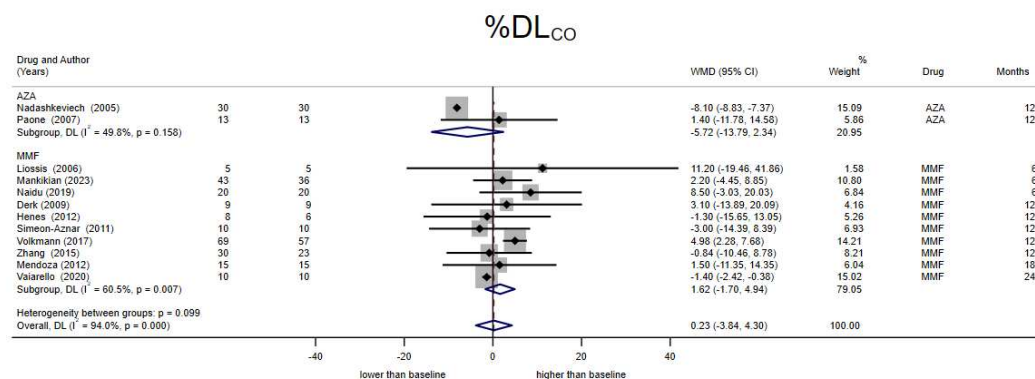

**Supplemental Figure 3 - Secondary endpoint analysis of efficacy on pulmonary function compared to baseline with summary estimate by follow-up time in MMF treated participants**

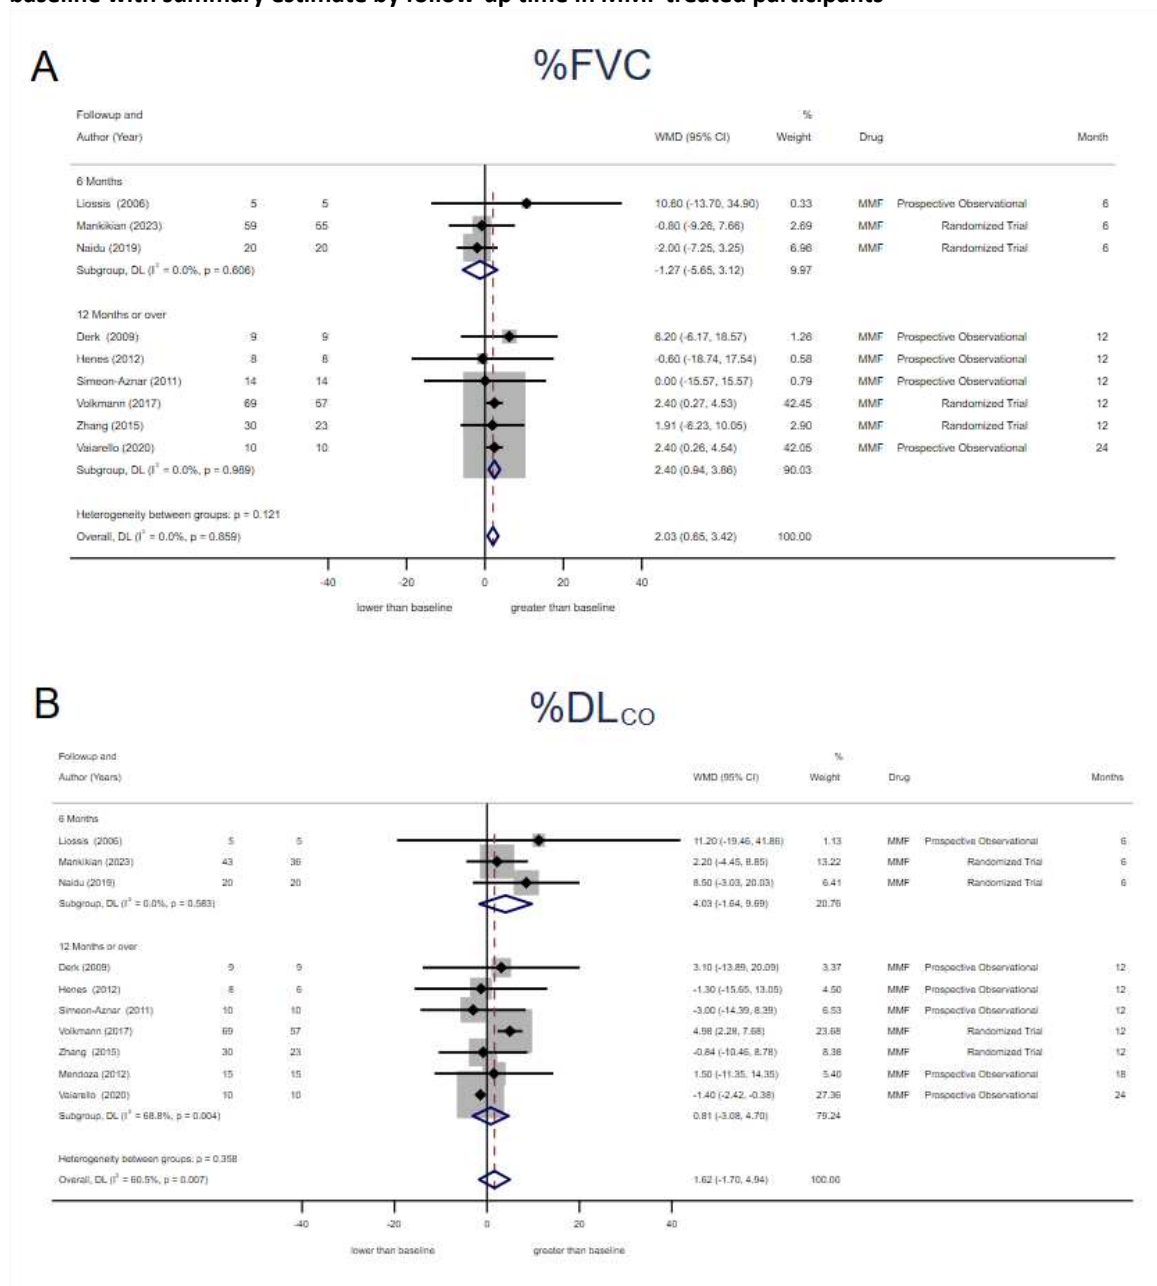

**Supplemental Table 3 – Table of adverse events**

| Author       | Diarrhoea | Nausea/<br>Vomit | Dyspepsia | Skin<br>infection | Pansinusitis | Pneumonia | Pleuritis | UTRI | Non infectious<br>respiratory tract<br>disorder | Cardiac<br>disorder | Lympho<br>penia/Le<br>ukopeni<br>a | Anaemia | Otitis<br>media | Hematuria | UTI | Oral<br>Candidosis |
|--------------|-----------|------------------|-----------|-------------------|--------------|-----------|-----------|------|-------------------------------------------------|---------------------|------------------------------------|---------|-----------------|-----------|-----|--------------------|
| Derk         | 2         |                  |           | 3                 |              | 1         |           |      |                                                 |                     |                                    |         |                 |           |     |                    |
| Henes        |           | 3                |           |                   | 1            |           |           |      |                                                 |                     |                                    |         |                 |           |     |                    |
| Liopsis      |           |                  |           |                   |              |           | 1         |      |                                                 |                     |                                    |         |                 |           |     |                    |
| Mankikian    |           |                  |           |                   |              |           |           |      | 12                                              | 2                   |                                    |         |                 |           |     |                    |
| Mendoza      | 3         |                  |           |                   |              |           |           | 3    |                                                 |                     | 2                                  |         |                 |           | 2   |                    |
| Nadashkevich |           | 3                | 2         |                   |              |           |           |      |                                                 |                     | 2                                  |         | 1               |           |     |                    |
| Naidu        | 15        |                  |           | 4                 |              | 2         |           | 5    |                                                 |                     |                                    | 1       |                 |           | 2   |                    |
| Paone        |           |                  |           |                   |              |           |           |      |                                                 |                     |                                    |         |                 |           |     |                    |
| Rolg         |           |                  |           |                   |              |           |           |      |                                                 |                     | 2                                  |         |                 |           |     |                    |
| Simeon-Aznar |           |                  |           |                   |              | 1         |           |      |                                                 |                     |                                    |         |                 |           |     |                    |
| Vaiarello    |           |                  |           |                   |              |           |           |      |                                                 |                     |                                    |         |                 |           |     |                    |
| Volkman      |           |                  |           |                   |              | 5         |           |      |                                                 |                     | 4                                  | 8       |                 | 3         |     |                    |
| Zhang        |           |                  |           | 2                 |              | 10        |           | 2    |                                                 |                     |                                    |         |                 |           | 1   | 1                  |

**REMAP-ILD Consortium list:**

| <b>Name</b>                 | <b>Institution</b>                                                                                                                                                     |
|-----------------------------|------------------------------------------------------------------------------------------------------------------------------------------------------------------------|
| Alexandre Biasi Cavalcanti  | Hospital of Coracao                                                                                                                                                    |
| Ali Mojibian                | Black Tusk Research Group                                                                                                                                              |
| Amanda Bravery              | Imperial College Clinical Trials Unit                                                                                                                                  |
| Amanda Goodwin              | University of Nottingham                                                                                                                                               |
| Ana Etges                   | Federal University of Rio Grande do Sul                                                                                                                                |
| Ana Sousa Marcelino Boshoff | Imperial College Clinical Trials Unit                                                                                                                                  |
| Andreas Guenther            | Justus-Liebig-University of Giessen                                                                                                                                    |
| Andrew Briggs               | London School of Hygiene and Tropical Medicine                                                                                                                         |
| Andrew Palmer               | University of Tasmania                                                                                                                                                 |
| Andrew Wilson               | University of East Anglia                                                                                                                                              |
| Anjali Crawshaw             | University Hospitals Birmingham                                                                                                                                        |
| Anna-Maria Hoffmann-Vold    | Oslo University Hospital                                                                                                                                               |
| Anne Bergeron               | University Hospitals Geneva                                                                                                                                            |
| Anne Holland                | Monash University                                                                                                                                                      |
| Anthony Gordon              | Imperial College London                                                                                                                                                |
| Antje Prasse                | Hannover Medical School                                                                                                                                                |
| Argyrios Tzouvelekis        | Yale University                                                                                                                                                        |
| Athina Trachalaki           | Imperial College London                                                                                                                                                |
| Athol Wells                 | Royal Brompton Hospital                                                                                                                                                |
| Avinash Anil Nair           | Christian Medical College Vellore                                                                                                                                      |
| Barbara Wendelberger        | Berry Consultants                                                                                                                                                      |
| Ben Hope-Gill               | Cardiff and Vale University Hospital                                                                                                                                   |
| Bhavika Kaul                | U.S. Department of Veterans Affairs Center for Innovation in Quality, Effectiveness, and Safety; Baylor College of Medicine and University of California San Francisco |
| Bibek Gooptu                | University of Leicester                                                                                                                                                |
| Bruno Baldi                 | Pulmonary Division, Heart Institute (InCor), University of Sao Paulo Medical School, Sao Paulo, Brazil                                                                 |
| Bruno Crestani              | Public Assistance Hospital of Paris                                                                                                                                    |
| Carisi Anne Polanczyk       | Federal University of Rio Grande do Sul                                                                                                                                |
| Carlo Vancheri              | University of Catania                                                                                                                                                  |
| Carlos Robalo               | European Respiratory Society                                                                                                                                           |
| Charlotte Summers           | University of Cambridge                                                                                                                                                |
| Chris Grainge               | University of Newcastle                                                                                                                                                |
| Chris Ryerson               | Department of Medicine and Centre of Heart Lung Innovations, University of British Columbia                                                                            |
| Christophe von Garnier      | Centre Hospitalier Universitaire Vaudois                                                                                                                               |
| Christopher Huntley         | University Hospitals Birmingham                                                                                                                                        |
| Claudia Ravaglia            | University of Bologna                                                                                                                                                  |
| Claudia Valenzuela          | Hospital Universitario de La Princesa                                                                                                                                  |
| Conal Hayton                | Manchester University Hospital                                                                                                                                         |
| Cormac McCarthy             | University College Dublin                                                                                                                                              |
| Daniel Chambers             | Queensland Health                                                                                                                                                      |
| Dapeng Wang                 | National Heart and Lung Institute, Imperial College London                                                                                                             |
| Daphne Bablis               | Imperial College Clinical Trials Unit                                                                                                                                  |
| David Thickett              | University of Birmingham                                                                                                                                               |
| David Turner                | University of East Anglia                                                                                                                                              |
| Deepak Talwar               | Metro Respiratory Centre Pulmonology & Sleep Medicine                                                                                                                  |
| Deji Adegunsoye             | University of Chicago                                                                                                                                                  |
| Devaraj Anand               | Royal Brompton Hospital                                                                                                                                                |
| Devesh Dhasmana             | University of St. Andrews                                                                                                                                              |
| Dhruv Parek                 | Birmingham University                                                                                                                                                  |
| Diane Griffiths             | University Hospitals Birmingham                                                                                                                                        |

|                       |                                                                                             |
|-----------------------|---------------------------------------------------------------------------------------------|
| Duncan Richards       | Oxford University                                                                           |
| Eliana Santucci       | Hospital of Coracao                                                                         |
| Elisabeth Bendstrup   | Aarhus University                                                                           |
| Elisabetta Balestro   | University of Padua                                                                         |
| Eliza Tsitoura        | University of Crete                                                                         |
| Emanuela Falaschetti  | Imperial College London                                                                     |
| Emma Karlsen          | Black Tusk Research Group                                                                   |
| Ena Gupta             | University of Vermont Health Network                                                        |
| Erica Farrand         | University of California, San Fransisco                                                     |
| Fasihul Khan          | University of Nottingham                                                                    |
| Felix Chua            | Royal Brompton Hospital                                                                     |
| Fernando J Martinez   | Weill Cornell Medicine                                                                      |
| Francesco Bonella     | Essen University Hospital                                                                   |
| Francesco Lombardi    | Division of Pulmonary Medicine, Fondazione Policlinico Universitario Agostino Gemelli IRCCS |
| Gary M Hunninghake    | Brigham and Women's Hospital                                                                |
| Gauri Saini           | Nottingham University Hospital                                                              |
| George Chalmers       | Glasgow Royal Infirmary                                                                     |
| Gisli Jenkins         | Imperial College London                                                                     |
| Gunnar Gudmundsson    | University of Iceland                                                                       |
| Harold Collard        | University of California, San Francisco                                                     |
| Helen Parfrey         | Royal Papworth Hospital NHS Foundation Trust                                                |
| Helmut Prosch         | Medical University of Vienna                                                                |
| Hernan Fainberg       | Imperial College London                                                                     |
| Huzafa Adamali        | North Bristol NHS Trust                                                                     |
| Iain Stewart          | National Heart and Lung Institute, Imperial College London                                  |
| Ian Forrest           | Newcastle Hospitals NHS Foundation Trust                                                    |
| Ian Glaspole          | Alfred Hospital                                                                             |
| Iazsmin Bauer-Ventura | The University of Chicago                                                                   |
| Imre Noth             | University of Virginia                                                                      |
| Ingrid Cox            | University of Tasmania                                                                      |
| Irina Strambu         | University of Medicine and Pharmacy                                                         |
| Jacobo Sellares       | Hospital Clínic de Barcelona                                                                |
| James Eaden           | Sheffield University Hospitals                                                              |
| Janet Johnston        | Manchester Royal Infirmary NHS Foundation Trust                                             |
| Jeff Swigris          | National Jewish Health                                                                      |
| John Blaikley         | Manchester University                                                                       |
| John S Kim            | University of Virginia                                                                      |
| Jonathan Chung        | The University of Chicago                                                                   |
| Joseph A Lasky        | Tulane & Pulmonary Fibrosis Foundation                                                      |
| Joseph Jacob          | University College London                                                                   |
| Joyce Lee             | University of Colorado                                                                      |
| Juergen Behr          | Ludwig Maximilian University of Munich                                                      |
| Karin Storrer         | Federal University of Sao Paulo                                                             |
| Karina Negrelli       | Hospital of Curacao                                                                         |
| Katarzyna Lewandowska | Institute of Tuberculosis and Lung Diseases                                                 |
| Kate Johnson          | The University of British Columbia                                                          |
| Katerina Antoniou     | University of Crete                                                                         |
| Katrin Hostettler     | University Hospital Basel                                                                   |
| Kerri Johansson       | University of Calgary                                                                       |
| Killian Hurley        | Royal College of Surgeons, Ireland                                                          |
| Kirsty Hett           | Cardiff and Vale University Health Board                                                    |
| Larissa Schwarzkopf   | The Institute for Therapy Research                                                          |
| Laura Fabbri          | National Heart and Lung Institute, Imperial College London                                  |
| Laura Price           | Royal Brompton Hospital                                                                     |



|                                     |                                                                                                                                                                                          |
|-------------------------------------|------------------------------------------------------------------------------------------------------------------------------------------------------------------------------------------|
| Laurence Pearmain                   | Manchester University                                                                                                                                                                    |
| Leticia Kawano-Dourado              | Hcor Research Institute, Hospital do Coracao, Sao Paulo, Brazil. 2. Pulmonary Division, University of Sao Paulo, Sao Paulo, Brazil. 3. MAGIC Evidence Ecosystem Foundation, Oslo, Norway |
| Liam Galvin                         | European Pulmonary Fibrosis Federation                                                                                                                                                   |
| Lisa G. Spencer                     | Liverpool University Hospitals NHS Foundation Trust                                                                                                                                      |
| Lisa Watson                         | Sheffield University Hospitals                                                                                                                                                           |
| Louise Crowley                      | Queen Elizabeth Hospital, University Hospitals Birmingham                                                                                                                                |
| Luca Richeldi                       | Agostino Gemelli IRCCS University Hospital Foundation                                                                                                                                    |
| Lucilla Piccari                     | Department of Pulmonary Medicine, Hospital del Mar, Barcelona (Spain)                                                                                                                    |
| Manuela Funke Chambour              | University of Bern                                                                                                                                                                       |
| Maria Molina-Molina                 | IDIBELL Bellvitge Biomedical Research Institute                                                                                                                                          |
| Mark Jones                          | Southampton University                                                                                                                                                                   |
| Mark Spears                         | University of Dundee Scotland                                                                                                                                                            |
| Mark Toshner                        | University of Cambridge                                                                                                                                                                  |
| Marlies Wijsenbeek-Lourens          | Erasmus University Medical Hospital                                                                                                                                                      |
| Martin Brutsche                     | Kantonsspital St.Gallen                                                                                                                                                                  |
| Martina Vasakova                    | Faculty Thomayer Hospital                                                                                                                                                                |
| Melanie Quintana                    | Berry Consultants                                                                                                                                                                        |
| Michael Gibbons                     | University of Exeter                                                                                                                                                                     |
| Michael Henry                       | Cork University Hospital                                                                                                                                                                 |
| Michael Keane                       | University College Dublin                                                                                                                                                                |
| Michael Kreuter                     | Heidelberg University Hospital                                                                                                                                                           |
| Milena Man Iuliu Hațeganu           | University of Medicine and Pharmacy                                                                                                                                                      |
| Mohsen Sadatsafavi                  | The University of British Columbia                                                                                                                                                       |
| Naftali Kaminski                    | Yale University                                                                                                                                                                          |
| Nazia Chaudhuri                     | Ulster University                                                                                                                                                                        |
| Nick Weatherley                     | Sheffield University Hospitals                                                                                                                                                           |
| Nik Hirani                          | The University of Edinburgh                                                                                                                                                              |
| Ovidiu Fira Mladinescu Victor Babeș | University of Medicine and Pharmacy                                                                                                                                                      |
| Paolo Spagnolo                      | University of Padua                                                                                                                                                                      |
| Paul Beirne                         | Leeds Teaching Hospitals NHS Foundation Trust                                                                                                                                            |
| Peter Bryce                         | Pulmonary Fibrosis Trust                                                                                                                                                                 |
| Peter George                        | Royal Brompton Hospital                                                                                                                                                                  |
| Philip L Molyneaux                  | Imperial College London                                                                                                                                                                  |
| Pilar Rivera Ortega                 | Interstitial Lung Disease Unit, Department of Respiratory Medicine, Wythenshawe Hospital. Manchester University NHS Foundation Trust. United Kingdom.                                    |
| Radu Crisan-Dabija                  | University of Medicine and Pharmacy "Grigore T. Popa" Iasi                                                                                                                               |
| Rahul Maida                         | University of Birmingham                                                                                                                                                                 |
| Raphael Borie                       | Public Assistance Hospital of Paris                                                                                                                                                      |
| Roger Lewis                         | Berry Consultants                                                                                                                                                                        |
| Rui Rolo                            | Braga Hospital                                                                                                                                                                           |
| Sabina Guler                        | University Hospital of Bern                                                                                                                                                              |
| Sabrina Paganoni                    | Massachusetts General Hospital                                                                                                                                                           |
| Sally Singh                         | University of Leicester.                                                                                                                                                                 |
| Sara Freitas                        | University Hospital Coimbra                                                                                                                                                              |
| Sara Piciucchi                      | Department of Radiology, GB Morgagni Hospital; Azienda USL Romagna                                                                                                                       |
| Shama Malik                         | Action for Pulmonary Fibrosis                                                                                                                                                            |
| Shaney Barratt                      | North Bristol NHS Trust                                                                                                                                                                  |
| Simon Hart                          | University of Hull                                                                                                                                                                       |
| Simone Dal Corso                    | Monash University                                                                                                                                                                        |
| Sophie Fletcher                     | Southampton University                                                                                                                                                                   |
| Stefan Stanel                       | Manchester University NHS Foundation Trust                                                                                                                                               |

|                 |                               |
|-----------------|-------------------------------|
| Stephen Bianchi | Thornbury Hospital            |
| Steve Jones     | Action for Pulmonary Fibrosis |
| Wendy Adams     | Action for Pulmonary Fibrosis |
